# Supplementary material for: Employing a Plant Probiotic Actinomycete for Growth Promotion of Lettuce (Lactuca sativa L. var. longifolia) Cultivated in a Hydroponic System under Nutrient Limitation
Source: MDPI journal article supplement (doi:10.3390/plants12223793), 2023-11-07
Supplement: s1 [file s1]

## **Employing a Plant Probiotic Actinomycete for Growth Promotion of Lettuce (*Lactuca sativa* L. var. longifolia) Cultivated in a Hydroponic System under Nutrient Limitation**

**Benyapa Kitwetch <sup>1</sup>, Pharada Rangseekaew <sup>2,3</sup>, Yupa Chromkaew <sup>4</sup>, Wasu Pathom-Aree <sup>2,3,\*</sup> and Sirasit Srinuanpan <sup>2,3,5,\*</sup>**

<sup>1</sup> Interdisciplinary Program in Biotechnology, Graduate School, Chiang Mai University, Chiang Mai 50200, Thailand

<sup>2</sup> Department of Biology, Faculty of Science, Chiang Mai University, Chiang Mai 50200, Thailand

<sup>3</sup> Center of Excellence in Microbial Diversity and Sustainable Utilization, Faculty of Science, Chiang Mai University, Chiang Mai 50200, Thailand

<sup>4</sup> Department of Plant and Soil Sciences, Faculty of Agriculture, Chiang Mai University, Chiang Mai 50200, Thailand;

<sup>5</sup> Biorefinery and Bioprocess Engineering Research Cluster, Chiang Mai University, Chiang Mai 50200, Thailand

\* Correspondence: wasu.p@cmu.ac.th (W.P.-a); sirasit.s@cmu.ac.th (S.S.)

**Table S1.** 16S rRNA sequence of isolated actinomycete

| 16S rRNA Sequence                                                                                                                                                                                                                                                                                                                                                                                                                                                                                                                                                                                                                                                                                                                                                                                                                                                                                                                                                                                                                                                                                                                                                                                                                                                                                                                                                                                                                                                                                                                                                                        |
|------------------------------------------------------------------------------------------------------------------------------------------------------------------------------------------------------------------------------------------------------------------------------------------------------------------------------------------------------------------------------------------------------------------------------------------------------------------------------------------------------------------------------------------------------------------------------------------------------------------------------------------------------------------------------------------------------------------------------------------------------------------------------------------------------------------------------------------------------------------------------------------------------------------------------------------------------------------------------------------------------------------------------------------------------------------------------------------------------------------------------------------------------------------------------------------------------------------------------------------------------------------------------------------------------------------------------------------------------------------------------------------------------------------------------------------------------------------------------------------------------------------------------------------------------------------------------------------|
| TTCGGGGTGGATTAGTGGCGAACGGGTGAGTAACACGTGGGCAATCTGCC<br>CTGCACTCTGGGACAAGCCCTGGAAACGGGGTCTAATAACGGGATACTGAT<br>CGCCTTGGGCATCCTTGGTGATCGAAAGCTCCGGCGGTGCAGGATGAGCC<br>CGCGGCCTATCAGCTTGTGGTGAGGTAATGGCTCACCAAGGCGACGACG<br>GGTAGCCGGCCTGAGAGGGCGACCGGCCACACTGGGACTGAGACACGGC<br>CCAGACTCCTACGGGAGGCAGCAGTGGGGAATATTGCACAATGGGCGAA<br>AGCCTGATGCAGCGACGCCGCGTGAGGGATGACGGCCTTCGGGTTGTAAA<br>CCTCTTTCAGCAGGGAAGAAGCGAAAGTGACGGTACCTGCAGAAGAAGC<br>GCCGGCTAACTACGTGCCAGCAGCCGCGGTAATACGTAGGGCGCGAGCGT<br>TGTCCGGAATTATTGGGCGTAAAGAGCTCGTAGGCGGCTTGTCGCGTCGGT<br>TGTGAAAGCCCCGGGGCTTAACCCCGGGTCTGCAGTCGATACGGGCAGGCT<br>AGAGTTCGGTAGGGGAGATCGGAATTCCTGGTGTAGCGGTGAAATGCGCA<br>GATATCAGGAGGAACACCGGTGGCGAAGGCGGATCTCTGGGCCGATACTG<br>ACGCTGAGGAGCGAAAGCGTGGGGAGCGAACAGGATTAGATACCCTGGT<br>AGTCCACGCCGTAAACGGTGGGCACTAGGTGTGGGCGACATTCCACGTCTG<br>TCCGTGCCGCAGCTAACGCATTAAGTGCCCCGCCTGGGGAGTACGGCCGC<br>AAGGCTAAAACTCAAAGGAATTGACGGGGGCCCCGCACAAGCGGCGGAGC<br>ATGTGGCTTAATTTCGACGCAACGCGAAGAACCTTACCAAGGCTTGACATA<br>CACCGGAAACGTCCAGAGATGGGCGCCCCCTTGTGGTTCGGTGTACAGGTG<br>GTGCATGGCTGTCGTCAGCTCGTGTCGTGAGATGTTGGGTTAAGTCCCGCA<br>ACGAGCGCAACCCTTGTCCCGTGTTGCCAGCAGGCCCTTGTGGTGCTGGGG<br>ACTCACGGGAGACCGCCGGGGTCAACTCGGAGGAAGGTGGGGACGACGT<br>CAAGTCATCATGCCCCCTTATGTCTTGGGCTGCACACGTGCTACAATGGCCG<br>GTACAATGAGCTGCGATACCGCGAGGTGGAGCGAATCTCAAAAAGCCGGT<br>CTCAGTTCGGATTGGGGTCTGCAACTCGACCCCATGAAGTCGGAGTCGCTA<br>GTAATCGCAGATCAGCATTGCTGCGGTGAATACGTTCCCGGGCCTTGTACA<br>CACCGCCCGTCACGTCACGAAAGTCGGTAACACCCGAAGCCGGTGGCCCA<br>ACCCCTTGTGGGGAGGGAGCTGTCTGAAGGTGGGACTGGCGATTGGGACG<br>AAGTCGTAAC |
